# Supplementary material for: Resistance of Subtype C HIV-1 Strains to Anti-V3 Loop Antibodies
Source: Hindawi journal article supplement (doi:10.1155/2012/803535), 2012-01-01
Supplement: f1 [file 803535.f1.zip]

Archive with 2 entries (2 files):
- SupplementaryFigure1.docx
- SupplementaryFigure2.docx
