# Supplementary figures and images for: Resistance of Subtype C HIV-1 Strains to Anti-V3 Loop Antibodies
Source: Hindawi journal article supplement (doi:10.1155/2012/803535), 2012-01-01

**
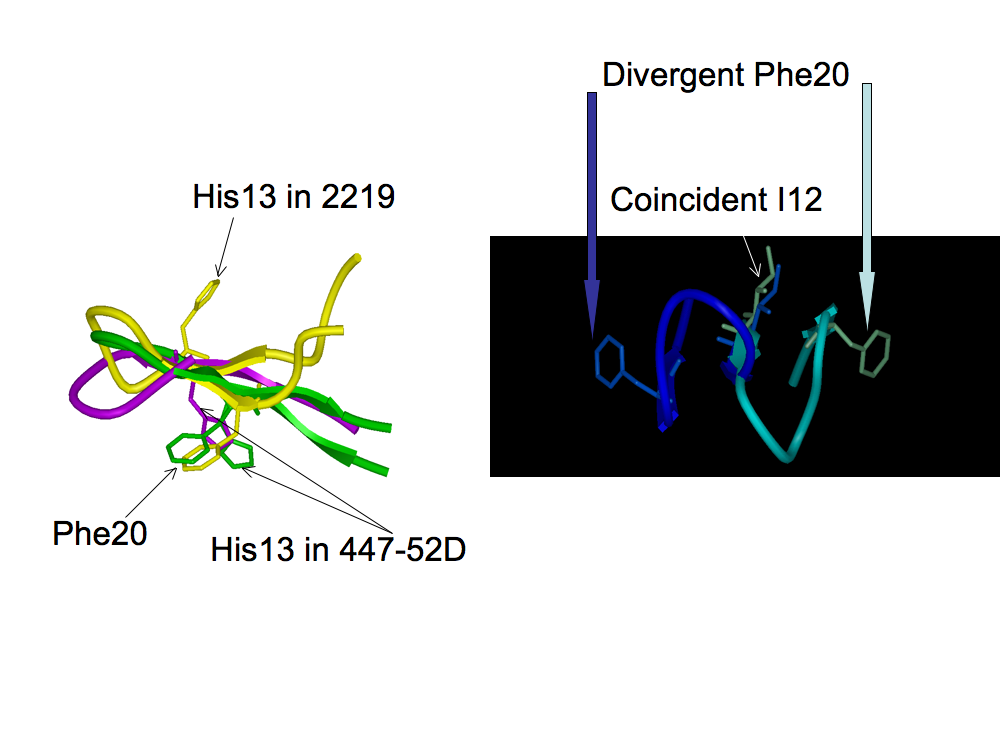
**

Supplement: f1 [file 803535.f1.zip › SupplementaryFigure1.docx]

**
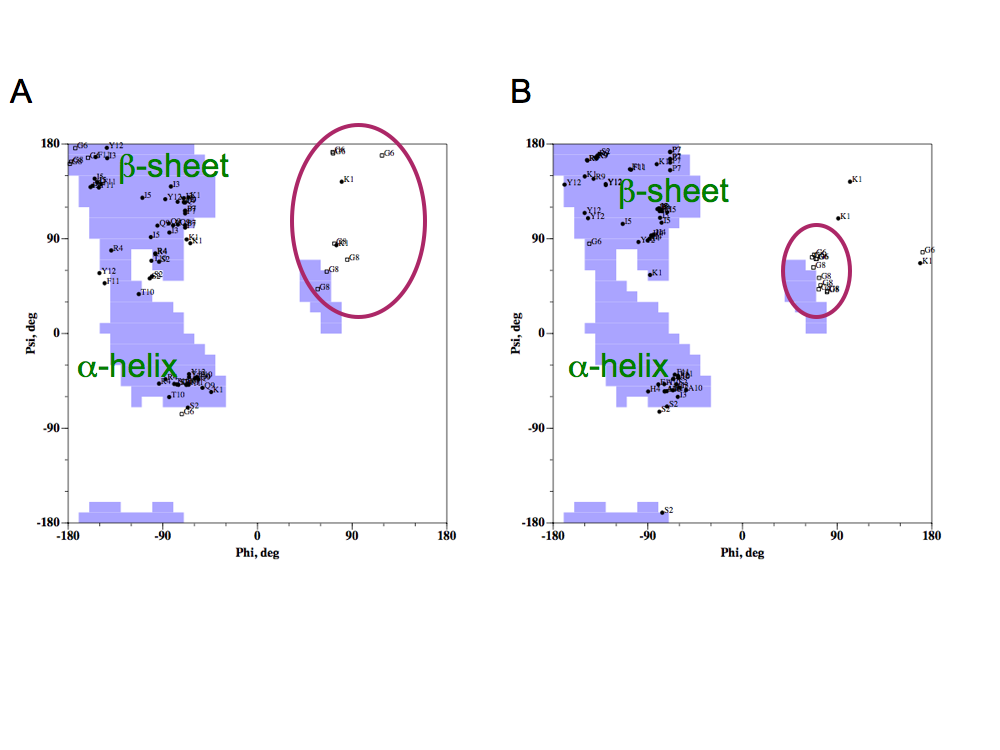
**

Supplement: f1 [file 803535.f1.zip › SupplementaryFigure2.docx]
